# Supplementary material for: Lignin-Modifying Enzymes in Scedosporium Species
Source: MDPI journal article supplement (doi:10.3390/jof9010105), 2023-01-12
Supplement: s1 [file s1]

**Table S1.** Primers used in this study.

| Gene (Accession CDS number)                               | Primer sequence                                                                                                                                 |
|-----------------------------------------------------------|-------------------------------------------------------------------------------------------------------------------------------------------------|
| <b>Peroxidases</b>                                        |                                                                                                                                                 |
| Cytochrome c peroxidase (SAPIO_CDS3675)                   | 1F : AAG TGG CAG TGG AGG AAG TG<br>1R : CGG AAC TCC TTG TCC TGG AC                                                                              |
| <i>Beta</i> -1,3 exoglucanase (SAPIO_CDS10447)            | 2F : CGC TGG ATA AGT GTG CGG A<br>2R : TGT TGC AGT TGG AGA TGG GG<br>3F : GGC TTC GAT GAC TCT TTT GC<br>3R : GTT TGC TGC TTC TGG AGG AC         |
| Catalase peroxidase (SAPIO_CDS10583)                      | 4F : TAT CGT GTC TTC GAC GGT CG<br>4R : AAA CAT TGT CGG GCC AGC TA<br>5F : CAC GCA TCT GGA ACA TAT CG<br>5R : AGT AGA TCC GCC CAG GAG AT        |
| Pseudogene (SAPIO_CDS4198)                                | 6F : CTC AAC AGC TGG CCT GAC AA<br>6R : CTC TCG GCA CCC CAA TAG AC                                                                              |
| <b>Oxidases</b>                                           |                                                                                                                                                 |
| Pseudogene (SAPIO_CDS2438)                                | 7F : GAG GAC GCA ATA CTG ACA AGC<br>7R : TGT TAG ATC CAC CAC GTC GC                                                                             |
| Iron transport multicopper oxidase (SAPIO_CDS0314)        | 8F : ACC GGT GGT ACC AGT CAG AA<br>8R : TTT ACC GTC GGC TGG GTT AC                                                                              |
| Iron transport multicopper oxidase (SAPIO_CDS8659)        | 9F : GCC TGC GGA TAA GAC TTT GGT<br>9R : GTC TCG TTG GTA TTG AAG TTA CC<br>10F : TCG GGG TAT TGT GCC ATA TT<br>10R : CCA CCT GGC GAG AGT ATT GT |
| L-ascorbate (SAPIO_CDS10367)                              | 11F : GAT GGT GTC CAT GGC GTG A<br>11R : TCG TGG AAG TGA TCA CCG AAC                                                                            |
| Hypothetical protein (SAPIO_CDS2597)                      | 12F : ACG GCA TCA GGC AGA TTG<br>12R : CCA CTG CAG GGC CAT TTA                                                                                  |
| Laccase (SAPIO_CDS6544)                                   | 13F : GGA ATG GTG CGA CTT TTC CG<br>13R : CCG TGA AAG TGA AGG CTG GT<br>14F : GGC AAT AAC CGT CAA GGT GT<br>14R : GTG GTA CCA TTC CCA TTT CG    |
| Uncharacterized protein (SAPIO_CDS9845)                   | 15F : ATG ATG GTG CCA ATG GTG TCA<br>15R : GGT GCC AAG AAG ACC GTT                                                                              |
| Endo- $\alpha$ -N-acetylgalactosaminidase (SAPIO_CDS0469) | 16F : CTT CCG CAT TGG CCT TGA TG<br>16R : ACT TCG ATG ATT TGG CCC TT                                                                            |
| Iron transport multicopper oxidase (SAPIO_CDS0322)        | 17F : GGC CAA CGA TGC AGT TTC<br>17R : CAA CTC GGG TGG TAG AAC ATC A                                                                            |
| Hypothetical protein (SAPIO_CDS8589)                      | 18F : GAA TCA CAA GCT GCA TCC CG<br>18R : CCC ATC CCA TCC ACA AGC AC                                                                            |
| Pseudogene (SAPIO_CDS4646)                                | 19F : ACA TCA GTC CGT ACA TGC CA<br>19R : GAC GAA TCG AGA CGA GAC GG                                                                            |

## Reference genes

|                                                                           |                                                                                                                                           |
|---------------------------------------------------------------------------|-------------------------------------------------------------------------------------------------------------------------------------------|
| Transcription protein on Pol III promoters – <i>TFCI</i> (SAPIO_CDS10483) | 20F: CAT CCA CCG TGC GTG GCA AA<br>20R: CAT CAT CAA TCC TCG AGG GC                                                                        |
| Ubiquitin carrier protein – <i>UbcB</i> (SAPIO_CDS7304)                   | 21F: CCG GAG AGT TGT GCC TTG A<br>21R: CAG GTT CGA TGC TTC GAC G<br>22F: GGC ACC TTT AGG CTG GTA AT<br>22R: GCC GGT GTT TGG ATC GTT TA    |
| Rho GTPase activator – <i>Sac7</i> (SAPIO_CDS7786)                        | 23F: CCG ATC GGT TGG ATT AGG AAC<br>23R: CAA GAC TCT TGC CAC GAA GG<br>24F: GCT ATG TCC CAA TCG TCG TG<br>24R: CTT TGC CGT ATC TGT CAG GC |
| Mitochondrial membrane fission protein – <i>Fis1</i> (SAPIO_CDS7496)      | 25F: GAT CAG TTC GAG AAG GAG GG<br>25R: GGA AGA TGT CGG AGA GGA GA<br>26F: TTC GAG AAG GAG GGT GAG AT<br>26R: GTA GTT GCC CAG CTT GTA GTT |
| GTP-binding protein – <i>SarA</i> (SAPIO_CDS5864)                         | 27F: CAT CAG CTC GGT CTC TAC CA<br>27R: CGT ATT GGG ACA ACC ACC GT                                                                        |
| Protein catabolic process – <i>UBC6</i> (SAPIO_CDS4591)                   | 28F: GAG AAC CCG CCA CCA TAC A<br>28R: CAA TAC TGG CCG CCA TGG TA<br>29F: GCC TTG ACA TTG CCC TTG AG<br>29R: TGC CTT TCC ATC TCC GAC TT   |
| Actin (SAPIO_CDS9600)                                                     | 30F: CCC TTG ACT TTG AGC AGG AGA TCC A<br>30R: CTC AAG ACC GAG GAC AGA GGG CTG                                                            |
| Beta-tubulin – <i>Tub</i> (SAPIO_CDS5417)                                 | 31F: TTC CGC AAC GGC CGA TAC CT<br>31R: CCA CGG GGA GGA ATA GAG CA                                                                        |
| GAPDH (SAPIO_CDS3929)                                                     | 32F: TCA ACG GTT TCG GTC GTA TC<br>32R: GCG TAC TTG GTC TCG ATG AA                                                                        |

---

**Table S2.** PCR efficiency according to *Scedosporium* species and the primer pair used.

| Gene (Accession CDS number)                                               | <i>S. apiospermum</i> |            | <i>S. aurantiacum</i> |            | <i>S. dehoogii</i> |            |
|---------------------------------------------------------------------------|-----------------------|------------|-----------------------|------------|--------------------|------------|
|                                                                           | Primer pair           | Efficiency | Primer pair           | Efficiency | Primer pair        | Efficiency |
| <b>Peroxidases</b>                                                        |                       |            |                       |            |                    |            |
| Cytochrome c peroxidase (SAPIO_CDS3675)                                   | 1                     | 113%       | 1                     | 110%       | 1                  | 95%        |
| Beta-1,3 exoglucanase (SAPIO_CDS10447)                                    | 2                     | 109%       | 2                     | 102%       | 3                  | 89%        |
| Catalase peroxidase (SAPIO_CDS10583)                                      | 4                     | 97%        | 4                     | 102%       | 5                  | 87%        |
| Pseudogene (SAPIO_CDS4198)                                                | 6                     | 102%       | 6                     | 119%       | 6                  | 91%        |
| <b>Oxidases</b>                                                           |                       |            |                       |            |                    |            |
| Pseudogene (SAPIO_CDS2438)                                                | 7                     | 107%       | 7                     | 104%       | 7                  | 92%        |
| Iron transport multicopper oxidase (SAPIO_CDS0314)                        | 8                     | 84%        | 8                     | 106%       | 8                  | 81%        |
| Iron transport multicopper oxidase (SAPIO_CDS8659)                        | 9                     | 97%        | 9                     | 108%       | 10                 | 81%        |
| L-ascorbate (SAPIO_CDS10367)                                              | 11                    | 96%        | 11                    | 103%       | 11                 | 91%        |
| Hypothetical protein (SAPIO_CDS2597)                                      | 12                    | 102%       | 12                    | 94%        | 12                 | 91%        |
| Laccase (SAPIO_CDS6544)                                                   | 13                    | 102%       | 13                    | 100%       | 14                 | 85%        |
| Uncharacterized protein (SAPIO_CDS9845)                                   | 15                    | 106%       | 15                    | 110%       | 15                 | 102%       |
| Endo- $\alpha$ -N-acetylgalactosaminidase (SAPIO_CDS0469)                 | 16                    | 92%        | 16                    | 113%       | 16                 | 98%        |
| Iron transport multicopper oxidase (SAPIO_CDS0322)                        | 17                    | 96%        | 17                    | 114%       | 17                 | 102%       |
| Hypothetical protein (SAPIO_CDS8589)                                      | 18                    | 87%        | 18                    | 107%       | 18                 | 89%        |
| Pseudogene (SAPIO_CDS4646)                                                | 19                    | 98%        | 19                    | 107%       | 19                 | 92%        |
| <b>Reference genes</b>                                                    |                       |            |                       |            |                    |            |
| Transcription protein on Pol III promoters – <i>TFC1</i> (SAPIO_CDS10483) | 20                    | 95%        | 20                    | 97%        | 20                 | 97%        |
| Ubiquitin carrier protein – <i>UbcB</i> (SAPIO_CDS7304)                   | 21                    | 91%        | 22                    | 101%       | 21                 | 106%       |
| Rho GTPase activator – <i>Sac7</i> (SAPIO_CDS7786)                        | 23                    | 102%       | 24                    | 76%        | 23                 | 95%        |
| Mitochondrial membrane fission protein – <i>FisI</i> (SAPIO_CDS7496)      | 25                    | 91%        | 26                    | 102%       | 25                 | 97%        |
| GTP-binding protein – <i>SarA</i> (SAPIO_CDS5864)                         | 27                    | 96%        | 27                    | 107%       | 27                 | 88%        |
| Protein catabolic process – <i>UBC6</i> (SAPIO_CDS4591)                   | 28                    | 96%        | 29                    | 95%        | 28                 | 85%        |
| Actin (SAPIO_CDS9600)                                                     | 30                    | 99%        | 30                    | 110%       | 30                 | 86%        |
| Beta-tubulin – <i>Tub</i> (SAPIO_CDS5417)                                 | 31                    | 100%       | 31                    | 97%        | 31                 | 88%        |
| GAPDH (SAPIO_CDS3929)                                                     | 32                    | 81%        | 32                    | 99%        | 32                 | 87%        |

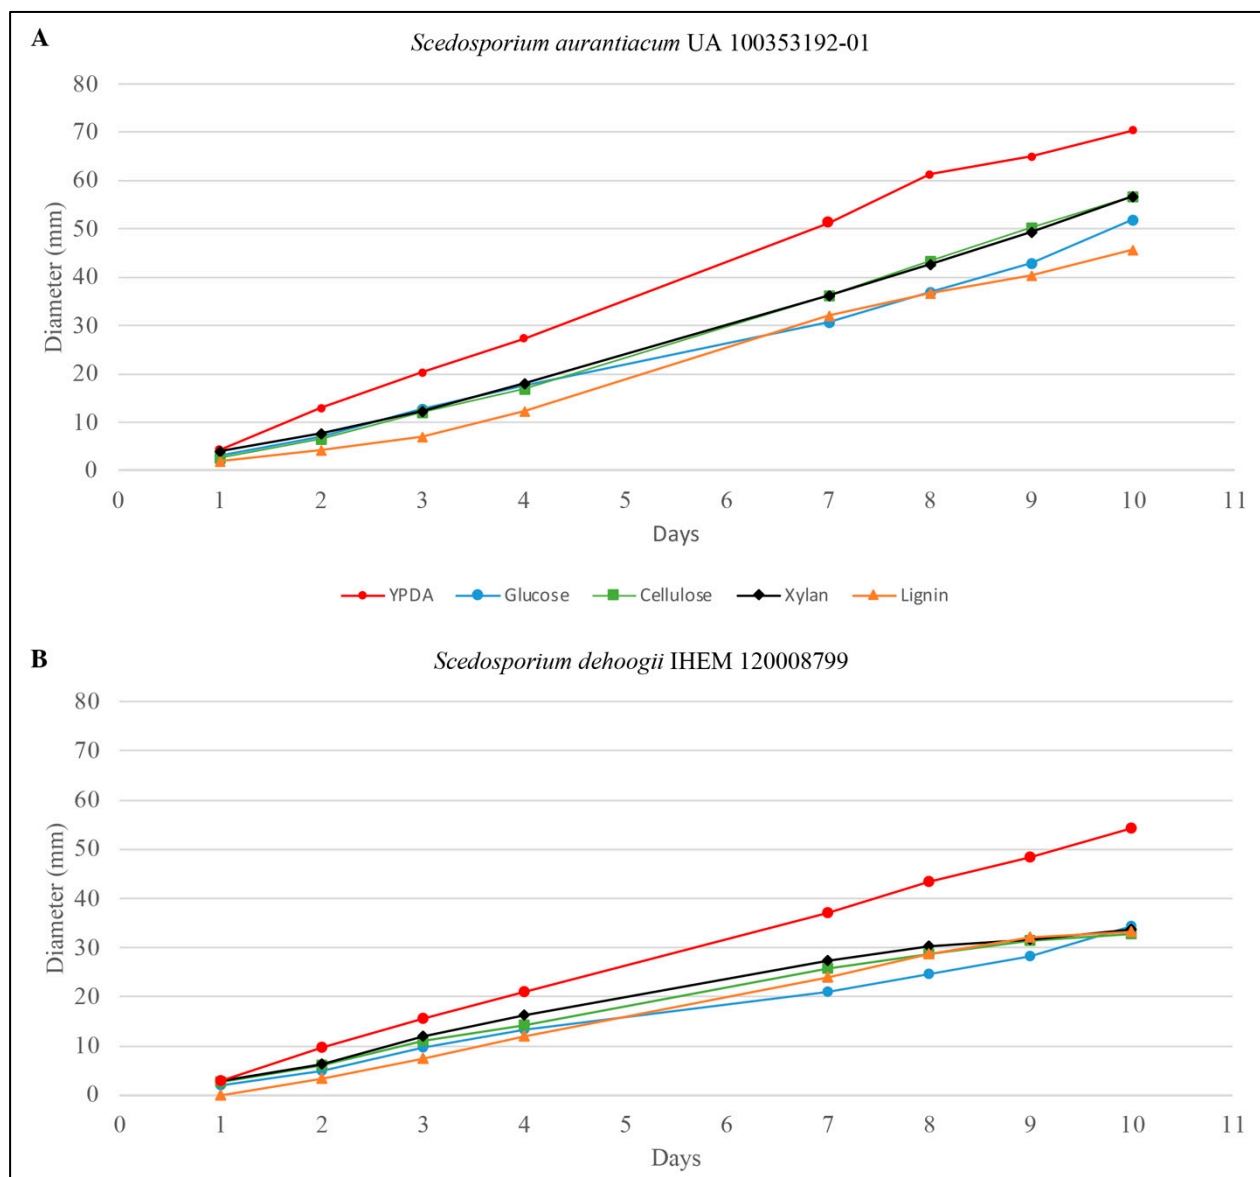

**Figure S1.** Kinetics of growth of *Scedosporium aurantiacum* UA 100353192-01 (**A**) and *Scedosporium dehoogii* IHEM 120008799 (**B**) on a synthetic agar-based medium Scedo-Select III containing a unique carbon source: glucose for control conditions, lignin, cellulose or xylan.
